# Supplementary material for: Alpha-Lipoic Acid Inhibits Spontaneous Diabetes and Autoimmune Recurrence in Non-Obese Diabetic Mice by Enhancing Differentiation of Regulatory T Cells and Showed Potential for Use in Cell Therapies for the Treatment of Type 1 Diabetes
Source: MDPI journal article supplement (doi:10.3390/ijms23031169), 2022-01-21
Supplement: s1 [file s1]

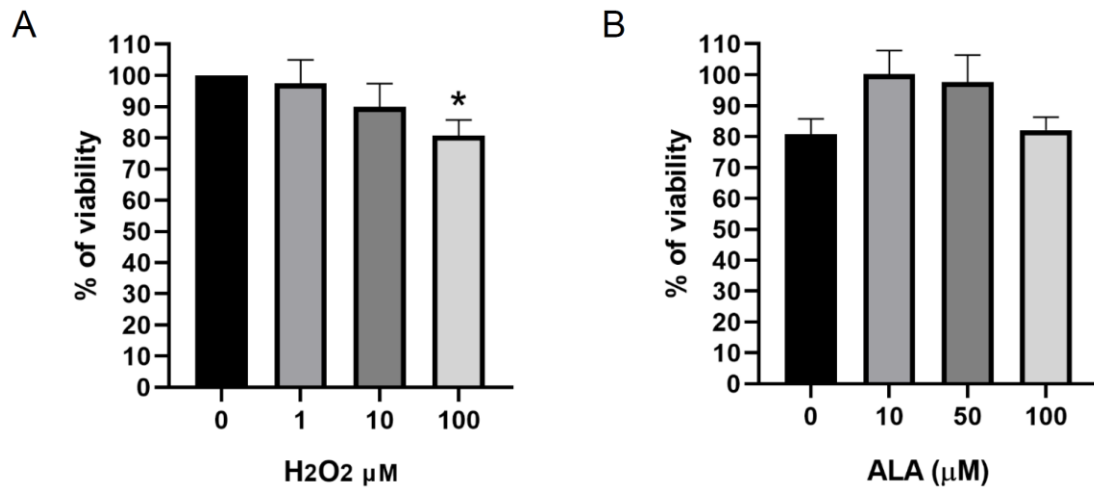

**Figure S1.** ALA treatment did not improve the survival of ROS-induced cell death in NIT-1 cell line. **(A)** NIT-1 cells were treated with various concentrations of H<sub>2</sub>O<sub>2</sub> for 24 hours and measured the viability of NIT-1 cells by 3-(4,5-Dimethylthiazol-2-yl)-2,5-diphenyltetrazolium bromide assay (MTT assay). We found that 100 μM H<sub>2</sub>O<sub>2</sub> treatment significantly induced the death of NIT-1 cells ( $n = 3$ ; 0 μM vs. 1 μM  $p = 0.7536$ , vs. 10 μM  $p = 0.2516$ , vs. 100 μM \*  $p = 0.0187$ ). **(B)** Different concentrations of ALA (10 μM, 50 μM, and 100 μM) was added into 100 μM H<sub>2</sub>O<sub>2</sub>-treated NIT-1 cells and measured the cell viability by MTT assay. Our results showed that ALA treatment did not provide a preventive effect in the ROS-induced cell death ( $n = 3$ ; 0 μM vs. 10 μM  $p = 0.0970$ , vs. 50 μM  $p = 0.1702$ , vs. 100 μM  $p = 0.8433$ ).

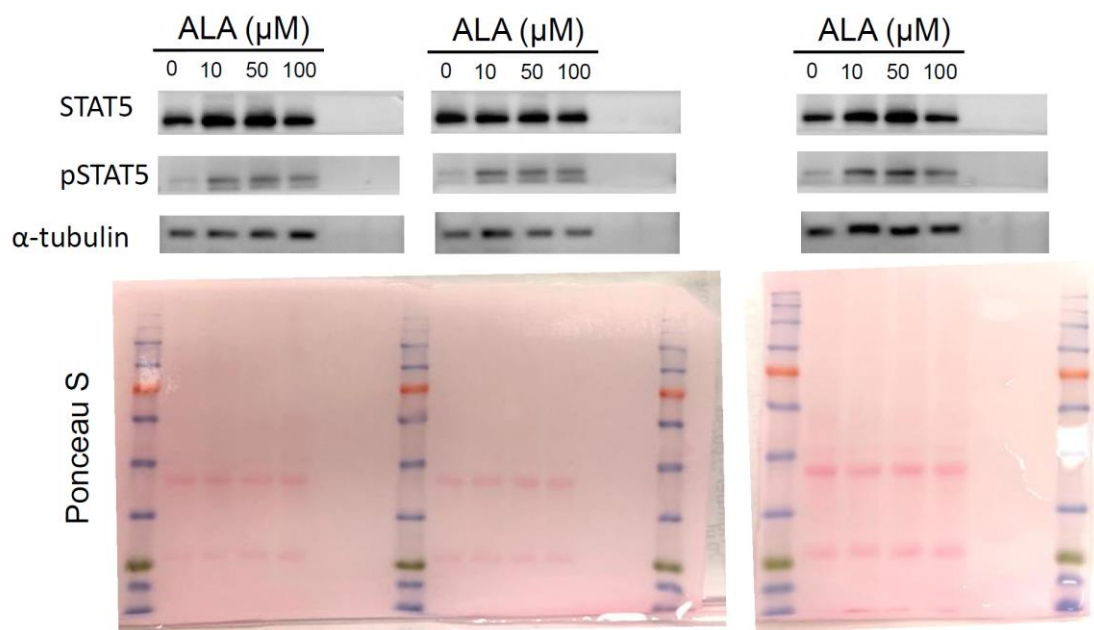

**Figure S2.** Three independent experiments of Western blotting for phosphorylated STAT5.

Negative in urine glucose with normoglycemia

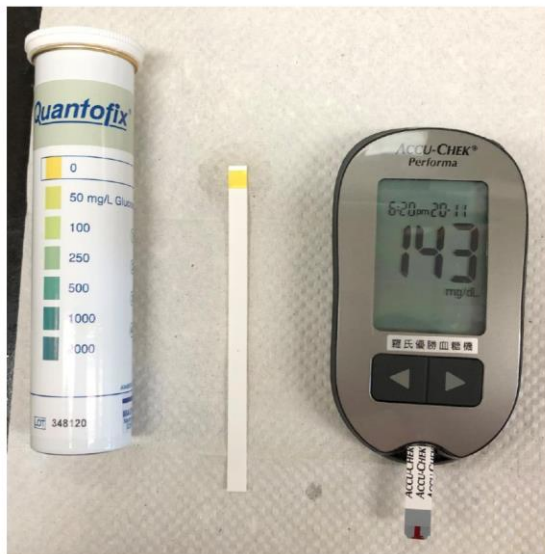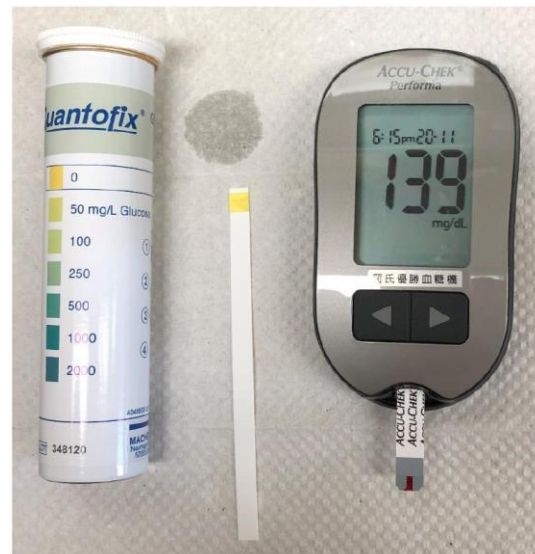

0–50 mg/L urine glucose with  
353 mg/dL blood glucose

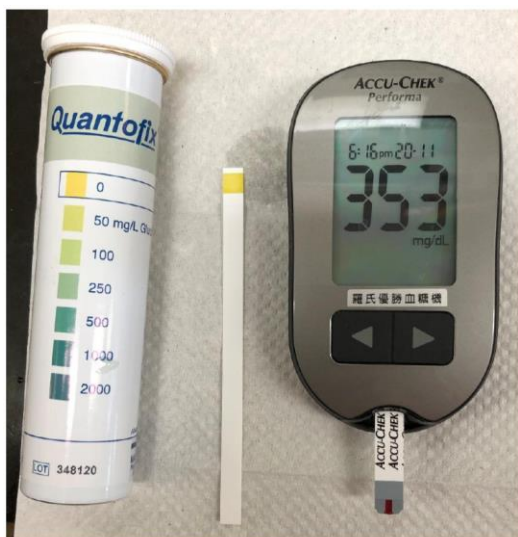

1000 mg/L urine glucose with  
454 mg/dL blood glucose

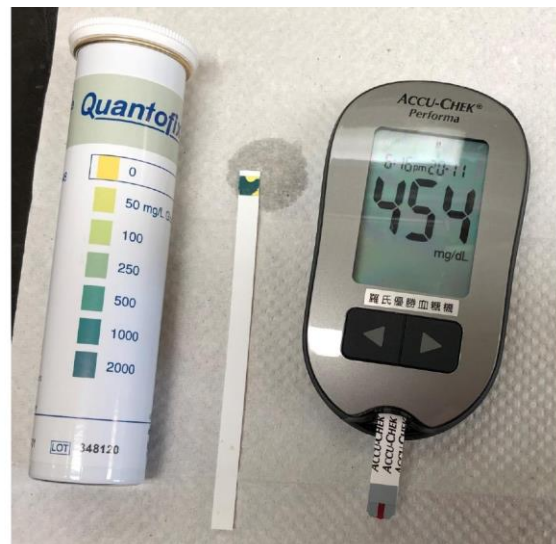

500–1000 mg/L urine glucose  
with 443 mg/dL blood glucose

500–1000 mg/L urine glucose  
with 455 mg/dL blood glucose

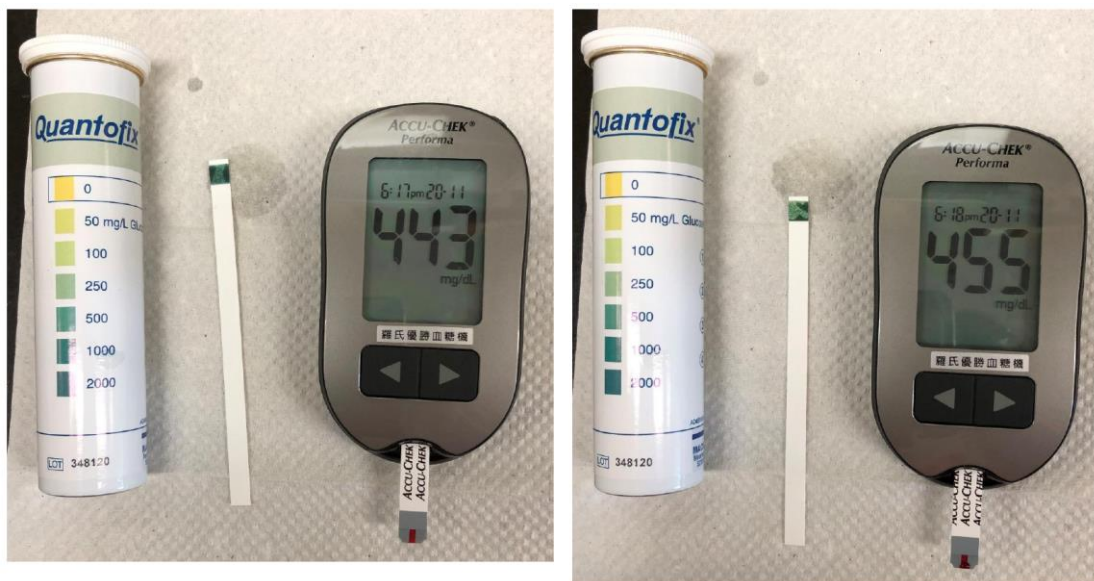

2000 mg/L urine glucose with blood glucose higher than 600 mg/dL

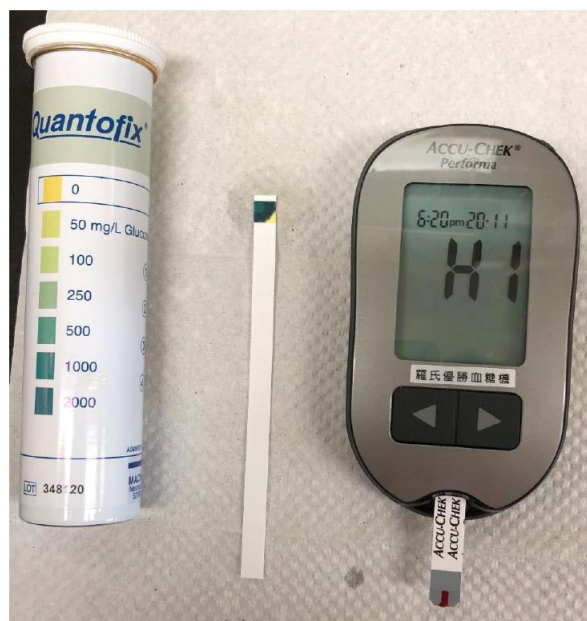

**Figure S3.** The correction between urine glucose and blood glucose in NOD mice.
